# Supplementary material for: Efficacy and safety of proton pump inhibitors versus vonoprazan in treatment of erosive esophagitis: A PRISMA-compliant systematic review and network meta-analysis
Source: PubMed Central journal article supplement (PMC9704910; doi:10.1097/md.0000000000031807), 2022-11-25
Supplement: medi-101-e31807-s002.pdf [file medi-101-e31807-s002.pdf]

**Table S2. Characteristics of the included studies**

| Study            | Treatment    | Population | Age(years) | N( male) | Diagnosis level | outcome |
|------------------|--------------|------------|------------|----------|-----------------|---------|
| Sontag,1992      | Ome 20mg, qd | 93         | NA         | NA       | HD II-IV        | 1 2 3   |
|                  | placebo      | 46         | NA         | NA       |                 |         |
| Hatlebakk,1993   | Lan 30mg, qd | 116        | 54.3       | 77       | Other 1-2       | 1 2 3   |
|                  | Ome 20mg, qd | 113        | 55.4       | 74       |                 |         |
| Corinaldesi,1995 | Pan 40mg, qd | 120        | 50         | 78       | SM 2-3          | 1 2 3   |
|                  | Ome 20mg, qd | 121        | 52         | 75       |                 |         |
| Mossner,1995     | Pan 40mg, qd | 191        | 53         | 133      | SM 2-3          | 1 2 3   |
|                  | Ome 20mg, qd | 95         | 55         | 66       |                 |         |
| Castell,1996     | Lan 30mg, qd | 421        | NA         | NA       | Other II-IV     | 1 2     |
|                  | Ome 20mg, qd | 431        | NA         | NA       |                 |         |
|                  | placebo      | 213        | NA         | NA       |                 |         |
| Mee,1996         | Lan 30mg, qd | 300        | 53.4       | 198      | SM 1-4          | 1 2     |
|                  | Ome 20mg, qd | 304        | 52.4       | 204      |                 |         |
| Earnest,1998     | Lan 30mg, qd | 66         | NA         | NA       | Other II-IV     | 1 2     |
|                  | placebo      | 71         | NA         | NA       |                 |         |
| Dekkers,1999     | Rab 20mg,qd  | 100        | 54±15.70   | 53       | HD II-IV        | 1 2 3   |
|                  | Ome 20mg, qd | 102        | 52±15.56   | 73       |                 |         |
| Vcev,1999        | Pan 40mg, qd | 60         | NA         | NA       | SM 1-2          | 1 2     |
|                  | Ome 20mg, qd | 60         | NA         | NA       |                 |         |
| Delchier,2000    | Rab 20mg,qd  | 104        | 55±15.7    | 47       | HD II-IV        | 1 2 3   |
|                  | Ome 20mg, qd | 103        | 53.0±15.1  | 40       |                 |         |
| Kahrilas,2000    | Eso 40mg,qd  | 654        | 44.8±13.0  | 384      | LA A-D          | 1 2     |
|                  | Ome 20mg, qd | 650        | 46.5±13.5  | 399      |                 |         |
| Richter,2000     | Pan 40mg, qd | 173        | 49.3±13.6  | 121      | HD II-IV        | 1 2 3   |
|                  | placebo      | 82         | 48.3±14.0  | 53       |                 |         |
| Dupas,2001       | Pan 40mg, qd | 226        | 53.0±14.5  | 165      | SM II-III       | 1 2 3   |
|                  | Lan 30mg, qd | 235        | 55.0±14.7  | 178      |                 |         |
| Richter,2001     | Eso 40mg,qd  | 1216       | NA         | 722      | LA I-IV         | 1 2 3   |
|                  | Ome 20mg, qd | 1209       | NA         | 760      |                 |         |
| Castell,2002     | Eso 40mg,qd  | 2624       | 47.0±13.0  | 1504     | LA A-D          | 1 2 3   |
|                  | Lan 30mg, qd | 2617       | 47.4±13.1  | 1501     |                 |         |
| Howden,2002      | Lan 30mg, qd | 143        | 47.0±12.0  | 57       | Other II-IV     | 1 2 3   |
|                  | Eso 40mg,qd  | 141        | 46.0±13.0  | 54       |                 |         |
| Mulder,2002      | Ome 20mg, qd | 151        | 51.6±15    | 88       | SM I-IV         | 2       |
|                  | Lan 30mg, qd | 154        | 51.2±14.4  | 94       |                 |         |
|                  | Pan 40mg, qd | 156        | 50.8±14.5  | 90       |                 |         |
| Gillessen,2004   | Pan 40mg, qd | 113        | 53±15      | 64       | LA B-C          | 1 2 3   |
|                  | Eso 40mg,qd  | 113        | 54±14      | 57       |                 |         |
| Chen,2004        | Eso 40mg,qd  | 52         | 46.3±24.7  | 32       | NA              | 1 2     |
|                  | Ome 20mg, qd | 51         | 47.2±23.5  | 33       |                 |         |
| Huang, 2004      | Ome 20mg, qd | 26         | 51.2       | 15       | NA              | 2       |
|                  | Lan 30mg, qd | 26         | 53.6       | 18       |                 |         |

|               |              |      |             |      |          |       |
|---------------|--------------|------|-------------|------|----------|-------|
| Zheng, 2004   | Rab 20mg,qd  | 44   | 50.2±12.5   | 29   | NA       | 2     |
|               | Pan 40mg, qd | 43   | 51.3±10.5   | 28   |          |       |
| Fennerty,2005 | Eso 40mg,qd  | 498  | 47.3 (13.2) | 327  | LA C-D   | 1 3   |
|               | Lan 30mg, qd | 501  | 47.1 (12.9) | 333  |          |       |
| Labenz,2005   | Eso 40mg,qd  | 1562 | 50.6±14     | 969  | LA I-IV  | 1 2   |
|               | Pan 40mg, qd | 1589 | 50.5±13.8   | 1012 |          |       |
| Pace,2005     | Rab 20mg,qd  | 277  | 47.7±14.2   | 190  | SM I-III | 1 2   |
|               | Ome 20mg, qd | 272  | 47.1±14.9   | 184  |          |       |
| Schmitt,2006  | Eso 40mg,qd  | 576  | 47.1±13.3   | 346  | LA A-D   | 1 2 3 |
|               | Ome 20mg, qd | 572  | 46.2±13.6   | 335  |          |       |
| Vcev,2006     | Eso 40mg,qd  | 90   | 51.2±14.5   | 57   | LA I-III | 1 2   |
|               | Pan 40mg, qd | 90   | 49.4±13.9   | 59   |          |       |
| Bardhan,2007  | Pan 40mg, qd | 288  | 53±14       | 141  | LA I-IV  | 1 2 3 |
|               | Eso 40mg,qd  | 293  | 54±14       | 154  |          |       |
| Wu, 2006      | Lan 30mg, qd | 58   | NA          | NA   | NA       | 2     |
|               | Ome 20mg, qd | 56   | NA          | NA   |          |       |
| Zheng, 2006   | Eso 40mg,qd  | 32   | NA          | NA   | NA       | 2     |
|               | Ome 20mg, qd | 33   | NA          | NA   |          |       |
| Cao, 2007     | Eso 40mg,qd  | 54   | 46.5±20.7   | 30   | NA       | 1 2   |
|               | Lan 30mg, qd | 50   | 47.8±17.6   | 28   |          |       |
| Oyama,2008    | Eso 40mg,qd  | 191  | NA          | NA   | LA A-D   | 1 2 3 |
|               | Ome 20mg, qd | 191  | NA          | NA   |          |       |
| Zheng,2009    | Ome 20mg, qd | 68   | 57.9±14.1   | 33   | LA A-D   | 2     |
|               | Lan 30mg, qd | 69   | 57.9±14.1   | 35   |          |       |
|               | Pan 40mg, qd | 69   | 57.8±13.2   | 34   |          |       |
|               | Eso 40mg,qd  | 68   | 57.4±12.8   | 33   |          |       |
| Cao, 2011     | Eso 40mg,qd  | 173  | NA          | NA   | NA       | 1 2   |
|               | Ome 20mg, qd | 172  | NA          | NA   |          |       |
| Song,2012     | Ila 10 mg.qd | 60   | NA          | NA   | LA A-D   | 1 2   |
|               | Eso 40mg,qd  | 60   | NA          | NA   |          |       |
| Ashida,2015   | Lan 30mg, qd | 132  | NA          | NA   | LA A-D   | 1 2 3 |
|               | Von 20mg,qd  | 144  | NA          | NA   |          |       |
| Ashida,2016   | Von 20mg,qd  | 207  | 58.3+13.8   | 137  | LA A-D   | 1 2 3 |
|               | Lan 30mg, qd | 202  | 57.4 +13.2  | 154  |          |       |
| Xue,2016      | Eso 40mg,qd  | 105  | 47.8±11.65  | 72   | LA A-D   | 1 2 3 |
|               | Ila 10 mg.qd | 107  | 48.9±12.63  | 75   |          |       |
| Yang, 2016    | Ome 20mg, qd | 48   | NA          | NA   |          | 2     |
|               | Lan 30mg, qd | 48   | NA          | NA   |          |       |
| Xue,2018      | Eso 40mg,qd  | 215  | 47.5±12.32  | 152  | LA A-D   | 1 2   |
|               | Ila 10 mg.qd | 322  | 48.2±11.96  | 232  |          |       |
| Uemura,2019   | Von 20mg,qd  | 139  | NA          | NA   | NA       | 2     |
|               | Lan 30mg, qd | 69   | NA          | NA   |          |       |
| Li, 2019      | Ila 10 mg.qd | 50   | 47.58±3.33  | 23   | NA       | 2     |
|               | Eso 40mg,qd  | 50   | 47.66±3.42  | 24   |          |       |

|           |              |     |              |    |    |     |   |   |   |
|-----------|--------------|-----|--------------|----|----|-----|---|---|---|
| Xiao,2020 | Von 20mg,qd  | 244 | 54.1±13.16)  | NA | LA | A-D | 1 | 2 | 3 |
|           | Lan 30mg, qd | 237 | 53.8 (12.53) | NA |    |     |   |   |   |

---

1: 4 weeks healing rates    2: 8 weeks healing rates    3: adverse event rate
