# Supplementary material for: Efficacy and safety of proton pump inhibitors versus vonoprazan in treatment of erosive esophagitis: A PRISMA-compliant systematic review and network meta-analysis
Source: PubMed Central journal article supplement (PMC9704910; doi:10.1097/md.0000000000031807), 2022-11-25
Supplement: medi-101-e31807-s003.pdf [file medi-101-e31807-s003.pdf]

**Table S3. Inconsistency factors of adverse event rates (previous)**

| Outcome             | Cycle       | IF and 95%CI                | P      |
|---------------------|-------------|-----------------------------|--------|
| adverse event rates | Ome-Pan-Von | IF=0.414,95%CI(0.00,1.46)   | 0.437  |
|                     | Ome-Pan-Eso | IF=0.387,95%CI(0.00,1.12)   | 0.302  |
|                     | Ome-Lan-Eso | IF=0.173,95%CI(0.00,0.83)   | 0.608  |
|                     | Lan-Pan-Eso | IF=0.716,95%CI(0.09,1.34) * | 0.026* |
|                     | Ome-Lan-Pan | IF=0.499,95%CI(0.00,1.41)   | 0.284  |

“\*” represents a significant difference.

Ome: omeprazole, 20mg/day; Pan: pantoprazole, 40mg/day; Lan: lansoprazole, 30mg/day; Rab: rabeprazole, 20mg/day; Ila: ilaprazole, 10mg/day; Eso: esomeprazole, 40mg/day; Von: vonoprazan 20mg/day ;PLA: placebo; IF= Inconsistency factor; CI= Confidence interval
