# Supplementary material for: Efficacy and safety of proton pump inhibitors versus vonoprazan in treatment of erosive esophagitis: A PRISMA-compliant systematic review and network meta-analysis
Source: PubMed Central journal article supplement (PMC9704910; doi:10.1097/md.0000000000031807), 2022-11-25
Supplement: medi-101-e31807-s004.pdf [file medi-101-e31807-s004.pdf]

**Table S4. Inconsistency by node-splitting of adverse event rates (previous)**

| Side      | Direct    |           | Indirect   |           | Difference |           | P> z   |
|-----------|-----------|-----------|------------|-----------|------------|-----------|--------|
|           | Coef.     | Std. Err. | Coef.      | Std. Err. | Coef.      | Std. Err. |        |
| Ome-Pan   | 0.1663964 | 0.3088    | -0.0617029 | 0.1366562 | 0.2280993  | 0.3376867 | 0.499  |
| Ome-Lan   | 0.3430674 | 0.2966461 | 0.193965   | 0.1740102 | 0.1491023  | 0.3439168 | 0.665  |
| Ome-Eso   | -0.002319 | 0.1066278 | 0.1168117  | 0.2253117 | -0.1191306 | 0.249414  | 0.633  |
| Ome-Pla   | 0.1071446 | 0.3776799 | 0.4441354  | 0.3306186 | -0.3369908 | 0.5019469 | 0.502  |
| Pan-Lan * | 0.6751797 | 0.2407436 | 0.0426129  | 0.1695838 | 0.6325668  | 0.2944759 | 0.032* |
| Pan-Eso   | 0.0044496 | 0.0899441 | 0.2653779  | 0.2209047 | -0.2609283 | 0.2384953 | 0.274  |
| Lan-Eso   | 0.0475058 | 0.1895507 | -0.4552392 | 0.1803537 | 0.5027449  | 0.2619964 | 0.055  |
| Lan-Pla   | 0.1786079 | 0.2901026 | -0.1583846 | 0.4096228 | 0.3369925  | 0.5019462 | 0.502  |

“\*” represents a significant difference.

Ome: omeprazole, 20mg/day; Pan: pantoprazole, 40mg/day; Lan: lansoprazole, 30mg/day;  
Rab: rabeprazole, 20mg/day; Ila: ilaprazole, 10mg/day; Eso: esomeprazole, 40mg/day; Von:  
vonoprazan 20mg/day ;Pla: placebo
