# Supplementary material for: Efficacy and safety of proton pump inhibitors versus vonoprazan in treatment of erosive esophagitis: A PRISMA-compliant systematic review and network meta-analysis
Source: PubMed Central journal article supplement (PMC9704910; doi:10.1097/md.0000000000031807), 2022-11-25
Supplement: medi-101-e31807-s005.pdf [file medi-101-e31807-s005.pdf]

**Table S5. OR from the network meta-analysis for healing rates with a low bias risk.**

| OR(95%CI)          |                    |                     |                    |                     |                     |                     |                   |
|--------------------|--------------------|---------------------|--------------------|---------------------|---------------------|---------------------|-------------------|
| Ome                | 1.17 (0.94,1.46)   | 1.35 (1.02,1.77)    | 0.78 (0.48,1.24)   | 1.57 (1.29,1.92)*   | 1.75 (1.07,2.85)*   | 1.56 (0.91,2.68)    | 0.09 (0.06,0.13)* |
| 0.95 (0.78,1.15)   | Lan                | 1.15 (0.86,1.54)    | 0.66 (0.39,1.11)   | 1.34 (1.08,1.67)*   | 1.49 (0.90,2.46)    | 1.33 (0.81,2.18)    | 0.08 (0.05,0.11)* |
| 0.88 (0.70,1.10)   | 0.93 (0.73,1.18)   | Pan                 | 0.58 (0.33,0.99)*  | 1.17 (0.91,1.50)    | 1.30 (0.78,2.17)    | 1.16 (0.65,2.05)    | 0.07 (0.05,0.10)* |
| 1.13 (0.77,1.64)   | 1.19 (0.78,1.82)   | 1.28 (0.83,1.99)    | Rab                | 2.03 (1.22,3.39)*   | 2.25 (1.14,4.45)*   | 2.01 (0.98,4.12)    | 0.12 (0.06,0.21)* |
| 0.69 (0.59,0.80)*  | 0.72 (0.61,0.86)   | 0.78 (0.64,0.95)    | 0.61 (0.41,0.92)   | Eso                 | 1.11 (0.71,1.74)    | 0.99 (0.58,1.70)    | 0.06 (0.04,0.08)* |
| 0.63 (0.42,0.95)*  | 0.67 (0.44,1.02)   | 0.72 (0.47,1.10)    | 0.56 (0.32,0.98)   | 0.92 (0.63,1.35)    | Ila                 | 0.89 (0.44,1.80)    | 0.05 (0.03,0.09)* |
| 0.74 (0.48,1.15)   | 0.78 (0.52,1.16)   | 0.84 (0.53,1.34)    | 0.66 (0.37,1.17)   | 1.08 (0.70,1.67)    | 1.17 (0.66,2.08)    | Von                 | 0.06 (0.03,0.11)* |
| 9.36 (6.64,13.21)* | 9.88 (7.03,13.89)* | 10.65 (7.35,15.42)* | 8.31 (4.99,13.85)* | 13.65 (9.62,19.37)* | 14.79 (8.84,24.73)* | 12.66 (7.50,21.38)* | Pla               |

Results of 4 weeks healing rates were listed in right upper triangles and results of 8 weeks healing rates were listed in left lower triangles. “\*” represents a significant difference.

Ome: omeprazole, 20mg/day; Pan: pantoprazole, 40mg/day; Lan: lansoprazole, 30mg/day; Rab: rabeprazole, 20mg/day; Ila: ilaprazole, 10mg/day; Eso: esomeprazole, 40mg/day; Von: vonoprazan 20mg/day ;PLA: placebo; **OR= Odds Ratio; CI= Confidence interval**

**Table S6. The results of SUCRA with a low bias risk.**

| Treatment | 4 weeks healing rates |          |          | 8 weeks healing rates |         |          |
|-----------|-----------------------|----------|----------|-----------------------|---------|----------|
|           | SUCRA                 | Pr. Best | MeanRank | SUCRA                 | Pr.Best | MeanRank |
| Ome       | 32.3                  | 0.0      | 5.7      | 28.8                  | 0.0     | 6.0      |
| Lan       | 41.1                  | 0.0      | 5.1      | 46.0                  | 0.0     | 4.8      |
| Pan       | 53.8                  | 0.1      | 4.2      | 62.4                  | 2.4     | 3.6      |
| Rab       | 25.0                  | 0.4      | 6.3      | 18.3                  | 0.2     | 6.7      |
| Eso       | 85.1                  | 21.6     | 2.0      | 81.9                  | 15.3    | 2.3      |
| Ila       | 89.0                  | 55.2     | 1.8      | 86.3                  | 51.8    | 2.0      |
| Von       | 73.7                  | 22.7     | 2.8      | 76.3                  | 30.3    | 2.7      |
| Pla       | 0.0                   | 0.0      | 8.0      | 0.0                   | 0.0     | 8.0      |

SUCRA: the surface under the cumulative ranking curve ;Pr. Best :probability of being the best;  
Ome: omeprazole, 20mg/day; Pan: pantoprazole, 40mg/day; Lan: lansoprazole, 30mg/day; Rab:  
rabeprazole, 20mg/day; Ila: ilaprazole, 10mg/day; Eso: esomeprazole, 40mg/day; Von:  
vonoprazan 20mg/day ;PLA: placebo
